# Supplementary material for: Structure determination of the theophylline–nicotinamide cocrystal: a combined powder XRD, 1D solid-state NMR, and theoretical calculation study
Source: Royal Society of Chemistry journal article supplement (doi:10.1039/c4ce00012a), 2014-01-01
Supplement: c4ce00012a1.pdf [file c4ce00012a1.pdf]

## Supporting Information

# Structure Determination of Theophylline-Nicotinamide Cocrystal: A Combined Powder XRD, 1D Solid-State NMR, and Theoretical Calculation Study

Ping Li,<sup>1,2,†</sup> Yueying Chu,<sup>3,†</sup> Lin Wang,<sup>1</sup> Robert M. Wenslow Jr.,<sup>4</sup> Kaichao Yu,<sup>2</sup> Hailu Zhang,<sup>1,\*</sup>

Zongwu Deng<sup>1</sup>

1 Laboratory of Magnetic Resonance Spectroscopy and Imaging, Suzhou Institute of Nano-tech and nano-bionics, Chinese Academy of Sciences, Suzhou 215123, P.R. China

2 School of Chemistry and Chemical Engineering, Huazhong University of Science and Technology, Wuhan 430074, P.R. China

3 State Key Laboratory of Magnetic Resonance and Atomic and Molecular Physics, Wuhan Institute of Physics and Mathematics, Chinese Academy of Sciences, Wuhan 430071, P.R. China

4 Crystal Pharmatech, Suzhou Industrial Park, Suzhou 215123, P.R. China

<sup>†</sup> These two authors made equal contributions.

---

\* corresponding author:

Tel.: +86-512-62872713, Fax: +86-512-62603079, E-mail: hlzhang2008@sinano.ac.cn (HLZ).

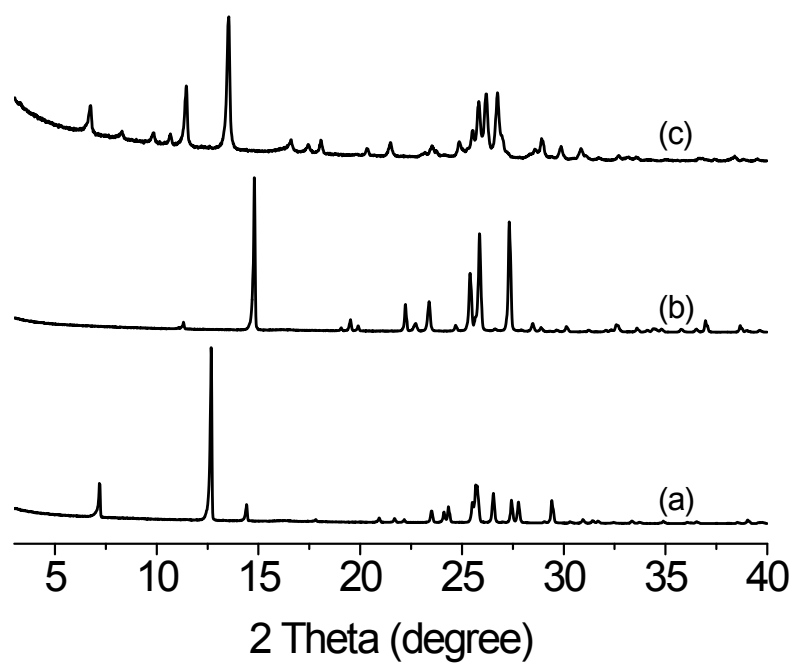

**Figure S1** XRPD patterns of TP (a), NCT (b) and TP-NCT cocrystal (c).

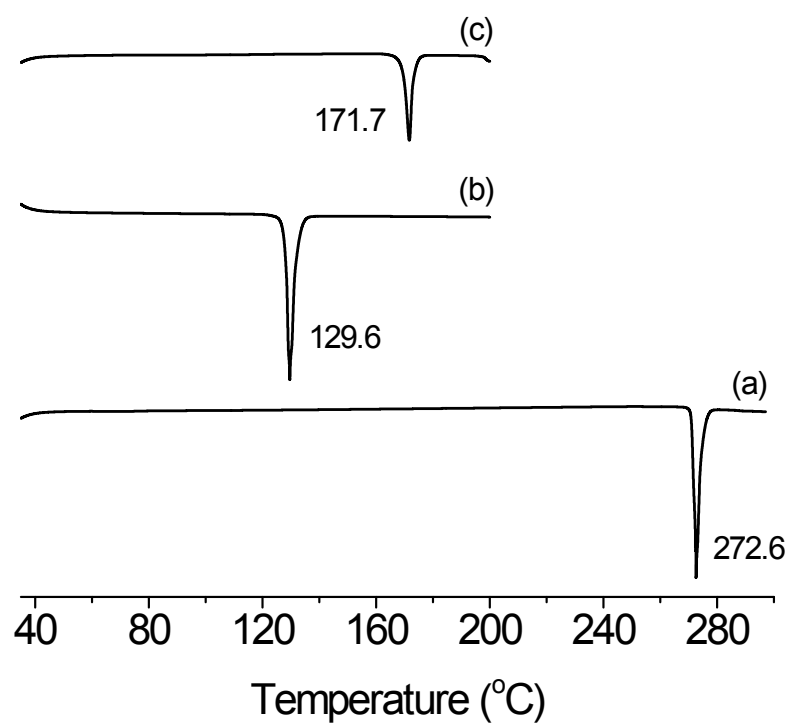

**Figure S2** DSC curves of TP (a), NCT (b) and TP-NCT cocrystal (c).

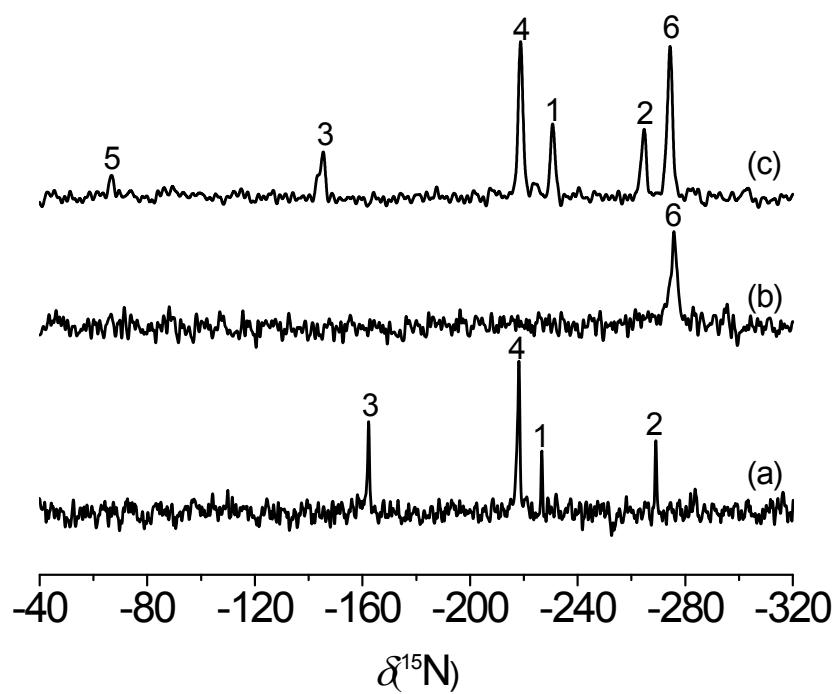

**Figure S3**  $^{15}\text{N}$  CP/MAS NMR spectra of TP (a), NCT (b) and TP-NCT cocrystal (c).
